# Supplementary material for: A ratiometric fluorescent and colorimetric probe for selective detection of hydrazine
Source: Royal Society of Chemistry journal article supplement (doi:10.1039/c5ra26683a), 2016-01-01
Supplement: c5ra26683a1.pdf [file c5ra26683a1.pdf]

## †Electronic Supporting Information

### **A ratiometric fluorescent and colorimetric probe for selective detection of hydrazine**

Hoyin Tse,<sup>a</sup> Qinghua Li,<sup>a</sup> Singming Chan,<sup>a</sup> Qihua You,<sup>a</sup> Albert W. M. Lee<sup>a</sup>, and Winghong Chan<sup>\*ab</sup>

<sup>a</sup>Department of Chemistry, Hong Kong Baptist University, Kowloon Tong, Hong Kong SAR, China

<sup>b</sup>Partner State Key Laboratory of Environmental and Bioanalysis, Kowloon Tong, Hong Kong, China

### **Content**

|                 |                                                                                                                                                                                                                                                                                                                                                                   | page |
|-----------------|-------------------------------------------------------------------------------------------------------------------------------------------------------------------------------------------------------------------------------------------------------------------------------------------------------------------------------------------------------------------|------|
|                 | Preparation of <b>COUMA2</b>                                                                                                                                                                                                                                                                                                                                      | 2    |
| <b>Fig. S1</b>  | <sup>1</sup> H NMR spectrum of <b>COUMA2</b>                                                                                                                                                                                                                                                                                                                      | 3    |
| <b>Fig. S2</b>  | <sup>13</sup> C NMR spectrum of <b>COUMA2</b>                                                                                                                                                                                                                                                                                                                     | 4    |
| <b>Fig. S3</b>  | HRMS MALDI-TOF spectrum of <b>COUMA2</b>                                                                                                                                                                                                                                                                                                                          | 5    |
| <b>Fig. S4</b>  | Emission of the probe <b>COUMA2</b> (50 μM) interacting with 100 equiv. of NH <sub>2</sub> NH <sub>2</sub> in different solvent systems (50 μM) at 17°C for 180min: Left: a. 100% H <sub>2</sub> O; b. 2:8, v/v, ACN-H <sub>2</sub> O; c. 2:8, v/v, EtOH-H <sub>2</sub> O; d. 2:8, v/v, DMSO-H <sub>2</sub> O in 0.01mM Britton-Robinson buffer solution, pH=7.0. | 6    |
| <b>Fig. S5</b>  | Change of fluorescence spectra of <b>COUMA2</b> (50 μM) in response to various concentration of NH <sub>2</sub> NH <sub>2</sub> covering the concentration range from 50 μM to 5 mM (2:8, v/v, DMSO-H <sub>2</sub> O, 0.01mM Britton-Robinson buffer solution, pH=7.0).                                                                                           | 7    |
| <b>Fig. S6</b>  | Change of fluorescence spectra of <b>COUMA2</b> (50 μM) in response to 100 equiv. NH <sub>2</sub> NH <sub>2</sub> at different pH buffer solution (2:8, v/v, DMSO-H <sub>2</sub> O, 0.01mM Britton-Robinson buffer solution).                                                                                                                                     | 7    |
| <b>Fig. S7</b>  | Fluorescent titration of the probe (50 μM) versus low equivalent of hydrazine in 2:8, v/v, DMSO-H <sub>2</sub> O in 40 mM Britton-Robinson buffer solution, pH=7.0 with reaction time of 15 hours.                                                                                                                                                                | 8    |
| <b>Table S1</b> | Determination of the LOD of the probe.                                                                                                                                                                                                                                                                                                                            | 8    |

## Experimental – Preparation of COUMA2

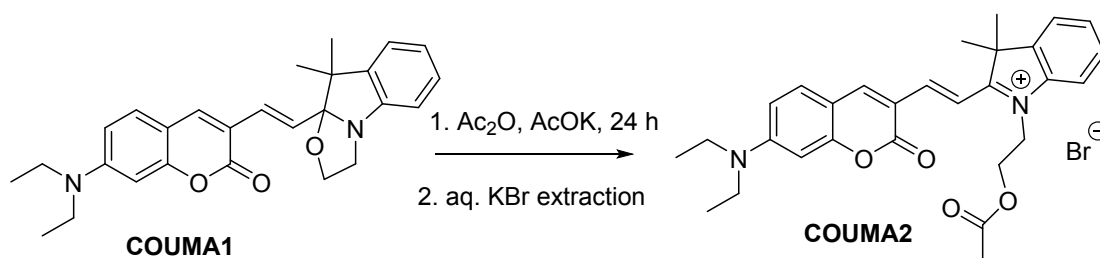

### **(E)-1-(2-acetoxyethyl)-2-(2-(7-(diethylamino)-2-oxo-2H-chromen-3-yl)vinyl)-3,3-dimethyl-3H-indol-1-ium bromide**

A mixture of **COUMA1** (87 mg, 0.2 mmol)<sup>1</sup> and **AcOK** (100 mg, 1 mmol) in acetic anhydride (1 mL) was stirred at room temperature for 24 h under N<sub>2</sub> atmosphere. Then, the mixture was diluted with ethyl acetate (EA, 5 mL) and saturated potassium bromide solution (5 mL), organic layer was separated and aqueous layer was extracted (3 x 25 mL). The organic layers was combined, re-washed with saturated potassium bromide solution for three times and dried over anhydrous Na<sub>2</sub>SO<sub>4</sub>. Solvent was removed under reduced pressure and the residue was purified by column chromatography on silica gel (EA to EA/MeOH=10/1) to afford **COUMA 2** as a dark blue solid (90 mg, 82% yield). m.p.: > 250 °C decomposed.

<sup>1</sup>H NMR (400 MHz, CDCl<sub>3</sub>) δ 10.32 (1H, s), 8.62 (1H, d, *J* = 16.0 Hz), 8.21 (1H, d, *J* = 16.0 Hz), 8.08 (1H, d, *J* = 9.2 Hz), 7.50-7.42 (4H, m), 6.66 (1H, dd, *J* = 9.2 Hz, *J*' = 2.4 Hz), 6.45 (1H, d, *J* = 2.4 Hz), 5.28 (2H, t, *J* = 4.8 Hz), 4.79 (2H, t, *J* = 4.8 Hz), 3.51 (4H, q, *J* = 7.2 Hz), 1.81 (6H, s), 1.73 (3H, s), 1.28 (6H, t, *J* = 7.2 Hz) ppm.

<sup>13</sup>C NMR (100 MHz, CDCl<sub>3</sub>) δ 181.6, 170.5, 161.3, 159.0, 154.8, 151.2, 149.5, 142.9, 141.6, 134.9, 128.9, 128.4, 122.6, 113.3, 112.8, 111.4, 111.0, 109.1, 96.9, 61.9, 51.6, 45.6, 30.9, 27.6, 20.4, 12.6 ppm.

HRMS (MALDI-TOF):  $m/z$  calcd for  $C_{29}H_{33}N_2O_4^+$  [ $M^+$ ] 473.2435, found, 473.2429.

### Notes and references

1. Q. You, Y. M. Lee, W. H. Chan, N. K. Mak, A. W. M. Lee, S. C. K. Hau, T. C. W. Mak, "A colorimetric and ratiometric fluorescent pH probe based on ring opening/closing approach change", *RSC Advances*,

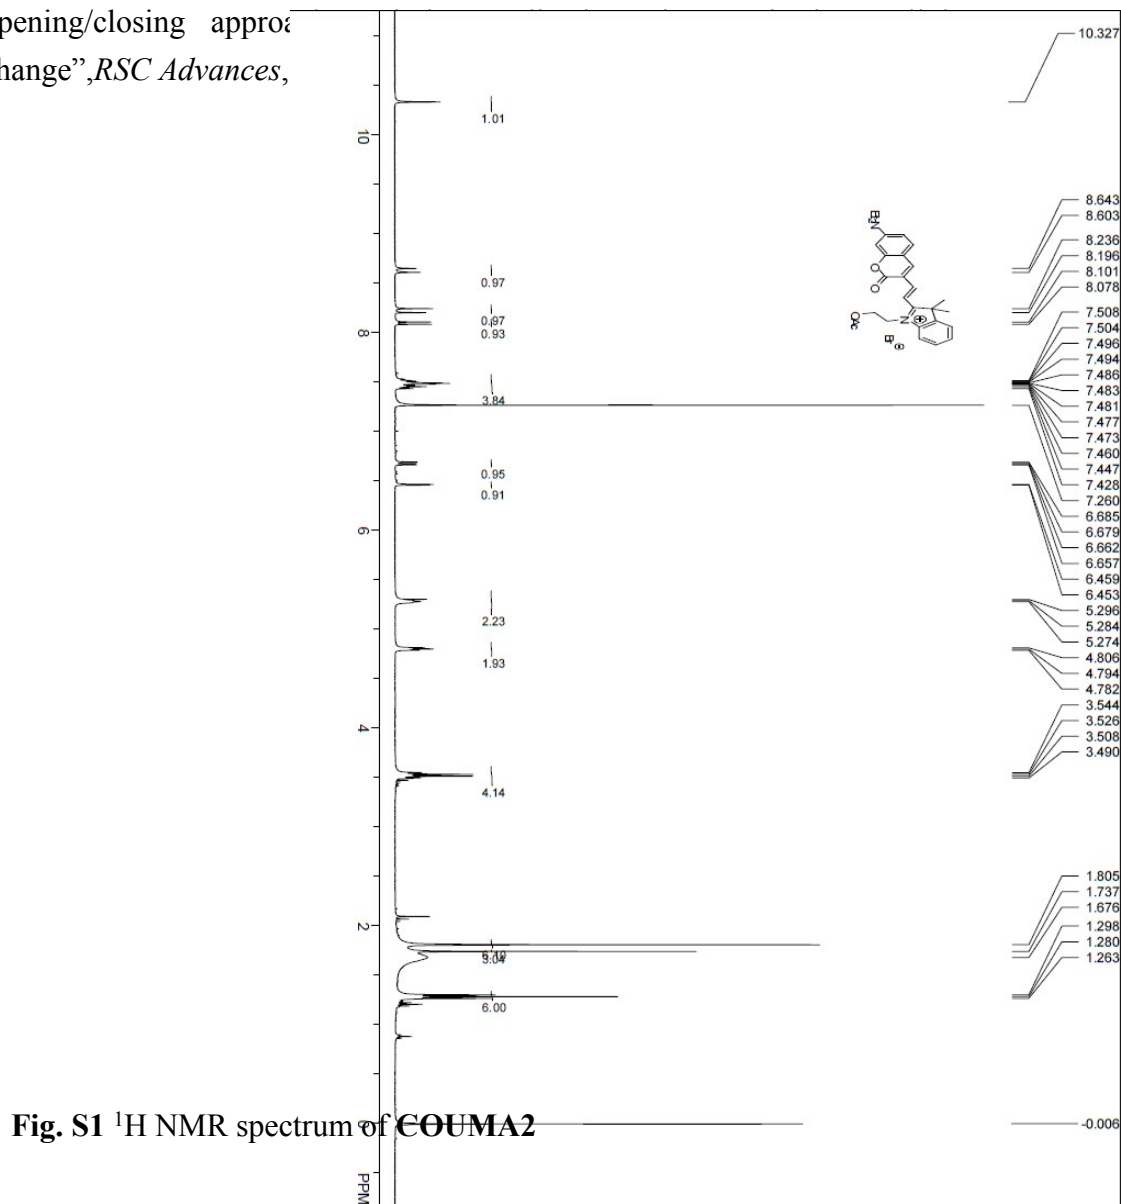

Fig. S1  $^1H$  NMR spectrum of COUMA2

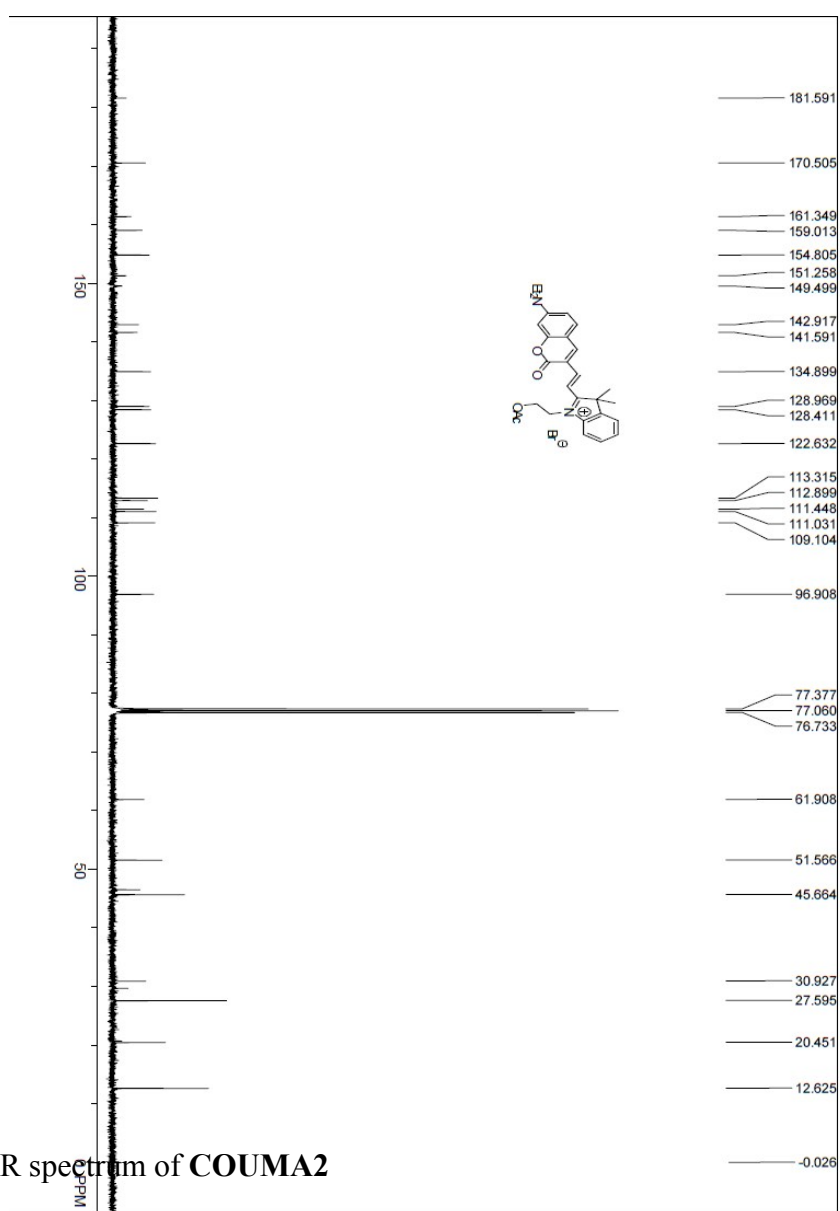

**Fig. S2**  $^{13}\text{C}$  NMR spectrum of COUMA2

Prof Chan

# HONG KONG BAPTIST UNIVERSITY, DEPARTMENT OF CHEMISTRY (MALDI-TOF)

Date of acquisition: 2015-12-07 16:51:37  
Comment 3: ERROR = -1.2678PPM  
autoflex  
Instrument type: 25001.00216  
Serial instrument number: 100 msec  
PIE delay in [ns]: POS  
Voltage polarity: TRUE [M+] = 473.2435  
Comment 1: FOUND [M+] = 473.2429  
Comment 2:  
Laser repetition rate in Hz: 20 psec  
Linear detector voltage: 1.888  
Ion source voltage 1: 19  
Ion source voltage 2: 16.98  
Ion source lens voltage: 8.100000400000001  
Mass calibration Constant 1: 727004.7441028279  
Mass calibration Constant 2: 133.5740003827668  
Third calib constant: -0.009639890524732485  
Number of shots: 66

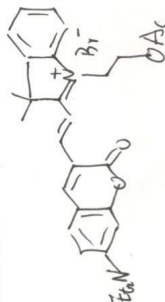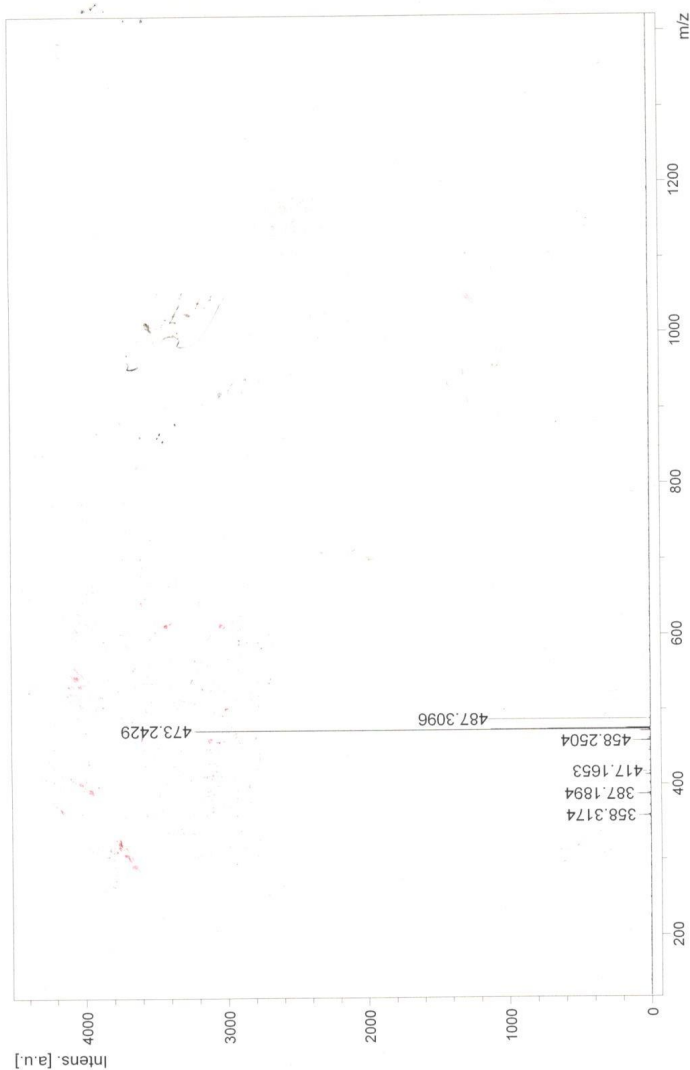

printed: 12/07/2015 04:51:54 PM

Acquisition method name: D:\Methods\files\Control\Methods\slvva\RP\_PepMix\_14-9-2015.par  
Sample name (file name prefix): CHAN-ic-OAC\_0\_D51

Fig. S3 HRMS MALDI-TOF spectrum of COUMA2

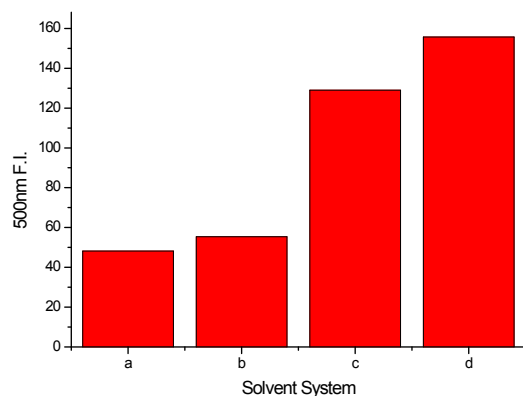

**Fig. S4** Emission of the probe **COUMA2** ( $50\mu\text{M}$ ) interacting with 100 equiv. of  $\text{NH}_2\text{NH}_2$  in different solvent systems ( $50\mu\text{M}$ ) at  $17^\circ\text{C}$  for 180min: Left: a. 100%  $\text{H}_2\text{O}$ ; b. 2:8, v/v, ACN- $\text{H}_2\text{O}$ ; c. 2:8, v/v, EtOH- $\text{H}_2\text{O}$ ; d. 2:8, v/v, DMSO- $\text{H}_2\text{O}$  in 40 mM Britton-Robinson buffer solution,  $\text{pH}=7.0$ .

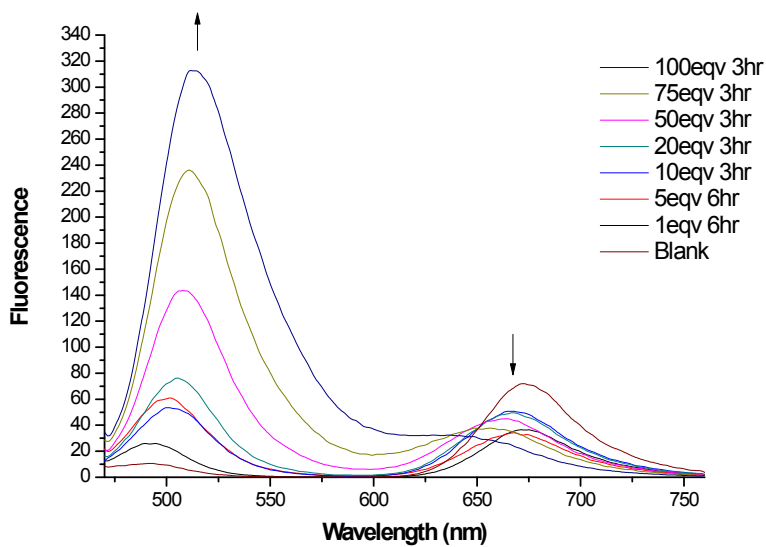

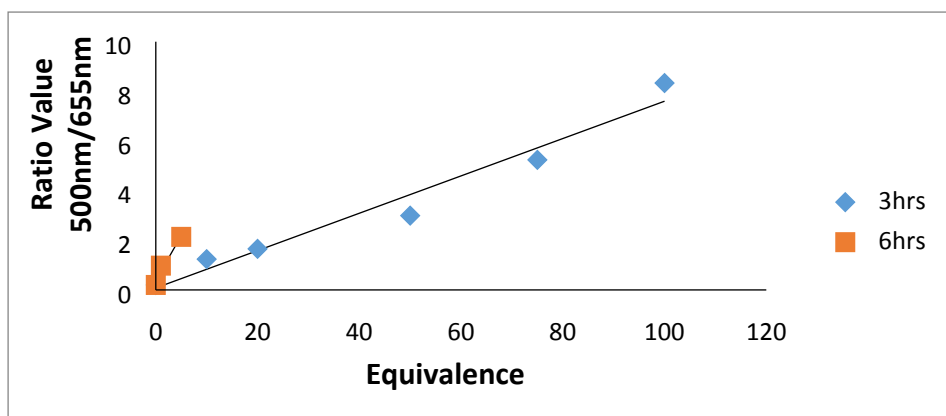

**Fig. S5** Change of fluorescence spectra of **COUMA2** (50 $\mu$ M) in response to various concentration of  $\text{NH}_2\text{NH}_2$  covering the concentration range from 50  $\mu$ M to 5 mM (2:8, v/v, DMSO- $\text{H}_2\text{O}$ , 40 mM Britton-Robinson buffer solution, pH=7.0).

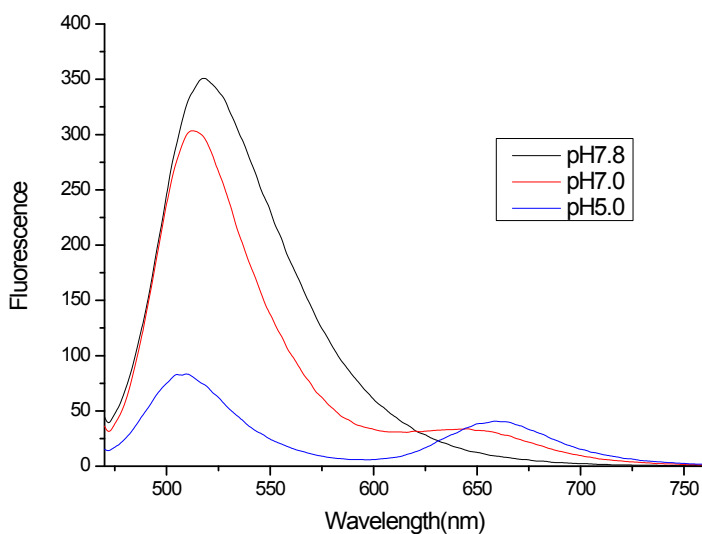

**Fig. S6** Change of fluorescence spectra of **COUMA2** (50 $\mu$ M) in response to 100 equiv.  $\text{NH}_2\text{NH}_2$  at different pH buffer solution (2:8, v/v, DMSO- $\text{H}_2\text{O}$ , 40 mM Britton-Robinson buffer solution).

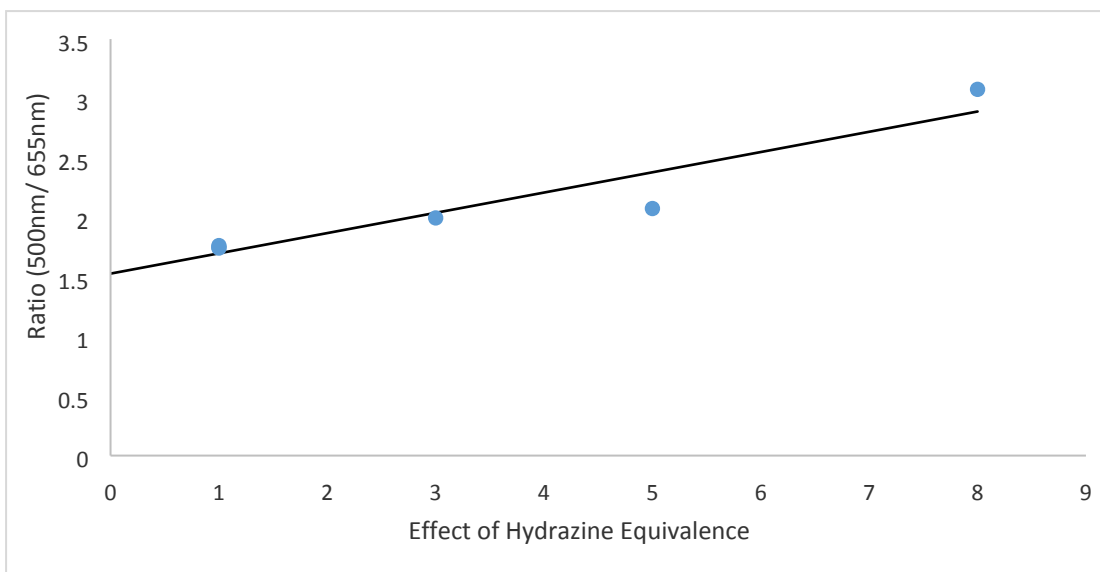

**Fig. S7** Fluorescent titration of the probe (50  $\mu\text{M}$ ) versus low equivalent of hydrazine in 2:8, v/v, DMSO- $\text{H}_2\text{O}$  in 40 mM Britton-Robinson buffer solution, pH=7.0 with reaction time of 15 hours.

**Table S1** Determination of the LOD of the probe

| For 15 hours reaction time                                                             |                                            |
|----------------------------------------------------------------------------------------|--------------------------------------------|
| 50 $\mu\text{M}$ COUMA2 vs 50 $\mu\text{M}$ hydrazine<br>(1.0 equivalent of hydrazine) | Fluorescence Ratio Value<br>(500nm/ 655nm) |
| 1 <sup>st</sup> trial                                                                  | 1.7646                                     |
| 2 <sup>nd</sup> trail                                                                  | 1.7438                                     |
| 3 <sup>rd</sup> trial                                                                  | 1.7510                                     |

Estimation of the LOD (Level of Detection) of the probe:

3 x Standard Deviation of Fluorescence ratio at Low Concentration/ Slope of the Calibration Line  
found in **Fig. S7**

$$= 3 \times (0.010565) / 0.1703$$

$$= 0.186 \mu\text{M}$$
